# Supplementary material for: Glucose reduced nano-Se mitigates Cu-induced ROS by upregulating antioxidant genes in zebrafish larvae
Source: Royal Society of Chemistry journal article supplement (doi:10.1039/d4na00644e), 2025-01-01
Supplement: d4na00644e1.xlsx [file d4na00644e1.xlsx]

## Sheet: SEM
30 mins reduced Glu-SeNPs									1 hour reduced Glu-SeNPs									30 mins reduced orange-SeNPs									1 hour reduced orange-SeNPs
S. No	LABEL	AREA	MEAN	MIN	MAX	ANGLE	LENGTH		S. No	LABEL	AREA	MEAN	MIN	MAX	ANGLE	LENGTH		S. No	LABEL	AREA	MEAN	MIN	MAX	ANGLE	LENGTH		S. No	LABEL	AREA	MEAN	MIN	MAX	ANGLE	LENGTH
1		0.019	172.868	149.324	221.757	-54.162	1.105		1		0.008	177.729	159.921	188.915	-96.582	0.777		1		0.016	125.782	97.606	151.447	-145.923	1.642		1		0.022	227.911	184.83	248	12.995	1.321
2		0.02	160.696	131	174.689	-112.249	1.183		2		0.008	192.435	172.166	215.136	-57.529	0.774		2		0.016	127.963	105	148.21	122.905	1.62		2		0.015	137.783	121.92	160	-12.529	0.913
3		0.017	175.471	150	222.587	-50.906	1.026		3		0.015	220.699	208	231.405	-36.431	1.549		3		0.017	107.609	83	151.623	-43.091	1.698		3		0.011	152.138	139.54	163	-128.66	0.634
4		0.017	195.686	185.565	207.815	17.526	0.991		4		0.01	191.109	165.338	209.68	-46.219	0.986		4		0.019	122.947	73	155.99	-155.556	1.933		4		0.016	133.615	118.316	160	-18.435	0.939
5		0.023	201.496	177.25	238.184	-106.504	1.401		5		0.008	175.992	164.461	198.815	-133.452	0.777		5		0.017	149.105	129	164.986	-102.381	1.679		5		0.023	223.018	183	244.504	-152.526	1.395
6		0.023	140.491	101	173.961	-102.529	1.376		6		0.01	203.9	175.593	237.531	-130.426	1.052		6		0.018	152.363	129.567	174.458	-166.908	1.766		6		0.027	140.708	98	201.273	178.264	1.634
7		0.021	169.493	155	183.061	-108.435	1.259		7		0.008	183.958	165.98	201.474	-158.962	0.827		7		0.02	143.449	108	167.961	-139.028	2.013		7		0.015	172.442	156.868	190.619	9.462	0.903
8		0.017	170.715	151	180.04	-153.435	1.001		8		0.012	182.006	167.435	197.543	-112.834	1.223		8		0.021	125.049	104.398	144.834	-51.17	2.105		8		0.016	178.601	150	215.873	-45	0.98
9		0.021	153.113	140.36	163.336	-156.501	1.248		9		0.006	114.186	100.084	125.013	-146.31	0.642		9		0.022	150.914	121.91	168.487	-155.821	2.148		9		0.02	146.79	112	180.5	-138.366	1.192
10	Mean	0.02	171.114	148.944	196.159	-91.911	1.177		10	Mean	0.01	182.446	164.331	200.613	-102.083	0.956		10	Mean	0.019	133.909	105.72	158.666	-92.997	1.845		10	Mean	0.018	168.112	140.497	195.974	-32.755	1.101
11	SD	0.003	19.112	24.695	26.735	54.832	0.156		11	SD	0.003	29.207	27.964	32.538	45.471	0.284		11	SD	0.002	15.586	19.471	10.498	92.995	0.207		11	SD	0.005	35.864	30.794	34.332	102.387	0.308
12	Min	0.017	140.491	101	163.336	-156.501	0.991		12	Min	0.006	114.186	100.084	125.013	-158.962	0.642		12	Min	0.016	107.609	73	144.834	-166.908	1.62		12	Min	0.011	133.615	98	160	-152.526	0.634
13	Max	0.023	201.496	185.565	238.184	17.526	1.401		13	Max	0.015	220.699	208	237.531	-36.431	1.549		13	Max	0.022	152.363	129.567	174.458	122.905	2.148		13	Max	0.027	227.911	184.83	248	178.264	1.634

## Sheet: Survival
30 mins reduced Glu-SeNPs								1 hour reduced Glu-SeNPs								30 mins reduced Orange-SeNPs								1 hour reduced Orange-SeNPs
Control	CuSO4	5 µg/ml	10 µg/ml	15 µg/ml	20 µg/ml	25 µg/ml		Control	CuSO4	5 µg/ml	10 µg/ml	15 µg/ml	20 µg/ml	25 µg/ml		Control	CuSO4	5 µg/ml	10 µg/ml	15 µg/ml	20 µg/ml	25 µg/ml		Control	CuSO4	5 µg/ml	10 µg/ml	15 µg/ml	20 µg/ml	25 µg/ml
100	41	93	90	97	100	100		100	41	87	92	90	90	97		100	41	90	92	95	87	88		100	41	88	86	96	86	70
96	50	100	100	94	100	100		96	50	93.33	96	98	100	94		96	50	85	95	97	77	86		96	50	93	96	90	90	80
100	32	86	80	100	94	95		100	32	88	89	92	88	100		100	32	80	85	90	85	82		100	32	86	90	92	84	77

## Sheet: DPPH
30 mins reduced Glu-SeNPs							1 hour reduced Glu-SeNPs							30 mins reduced orange-SeNPs							1 hour reduced orange-SeNPs
ASA	5 µg/ml	10 µg/ml	15 µg/ml	20 µg/ml	25 µg/ml		ASA	5 µg/ml	10 µg/ml	15 µg/ml	20 µg/ml	25 µg/ml		ASA	5 µg/ml	10 µg/ml	15 µg/ml	20 µg/ml	25 µg/ml		ASA	5 µg/ml	10 µg/ml	15 µg/ml	20 µg/ml	25 µg/ml
49.79	25.0012	27.4998	29.646	32.946	35.974		49.79	21.9849	25.9769	26.9794	28.1686	31.3116		49.79	12.8	13.61	16.12	15.15	14.66		49.79	11.85	14.6113	17.399	16.998	15.946
52.69	22.3184	25.684	28.946	31.956	33		52.69	16.9794	20.976	22.7946	25.0034	29.364		52.69	16.31	17.89	19.82	18.75	16.94		52.69	15.64	16.9764	19.9461	17.0646	15.098
48.42	20.9745	23.1987	25.974	28.946	30.645		48.42	17.6466	18.9746	21.0711	25.1973	27.1991		48.42	15.37	15.13	19.93	17.04	18.02		48.42	12.674	13.074	16.0446	13.9461	13.294

## Sheet: ABTS
30 mins reduced Glu-SeNPs							1 hour reduced Glu-SeNPs							30 mins reduced orange-SeNPs							1 hour reduced orange-SeNPs
ASA	5 µg/ml	10 µg/ml	15 µg/ml	20 µg/ml	25 µg/ml		ASA	5 µg/ml	10 µg/ml	15 µg/ml	20 µg/ml	25 µg/ml		ASA	5 µg/ml	10 µg/ml	15 µg/ml	20 µg/ml	25 µg/ml		ASA	5 µg/ml	10 µg/ml	15 µg/ml	20 µg/ml	25 µg/ml
54.5547	22.9764	25.7941	28.1586	29.1266	32.9875		54.5547	21.0649	24.9765	26.3196	27.5698	30.5987		54.5547	17.4964	18.3265	23.049	20.4653	18.3652		54.5547	16.8745	17.8964	21.9764	19.9816	18.6563
58.8035	21.7641	24.0976	26.059	32.9874	34.8971		58.8035	20.9564	23.9746	25.9641	29.4265	31.8946		58.8035	18.9785	19.3565	21.9794	18.6985	15.9451		58.8035	17.3684	19.4563	20.0784	17.6546	16.4536
51.2576	19.2585	20.9643	23.9465	28.2146	29.8965		51.2576	17.6436	20.5413	22.8645	24.7963	27.5664		51.2576	12.988	15.1465	18.7465	16.8521	14.763		51.2576	13.4896	14.9785	17.4661	15.6975	14.9795

## Sheet: SOD
30 mins reduced Glu-SeNPs								1 hour reduced Glu-SeNPs								30 mins reduced Orange-SeNPs								1 hour reduced Orange-SeNPs
Control	CuSO4	5 µg/ml	10 µg/ml	15 µg/ml	20 µg/ml	25 µg/ml		Control	CuSO4	5 µg/ml	10 µg/ml	15 µg/ml	20 µg/ml	25 µg/ml		Control	CuSO4	5 µg/ml	10 µg/ml	15 µg/ml	20 µg/ml	25 µg/ml		Control	CuSO4	5 µg/ml	10 µg/ml	15 µg/ml	20 µg/ml	25 µg/ml
17.7475	6.15564	11.0856	11.9436	13.0545	14.5834	16.0827		17.7475	6.15564	8.8944	9.02605	11.8792	12.0529	13.4287		17.7475	6.15564	9.5122	10.0068	12.6979	10.7693	10.1341		17.7475	6.15564	8.1862	9.8707	10.5337	9.41483	8.95464
17.1471	9.29178	10.8598	11.0639	12.8986	13.903	13.0237		17.1471	9.29178	10.1902	10.7973	12.8255	13.5024	14.8016		17.1471	8.29178	10.9635	11.3436	12.7454	12.0479	10.8586		17.1471	8.29178	10.0263	11.5372	12.6374	11.2357	10.8987
15.8274	7.5682	8.8362	10.2228	11.0889	13.1001	15.1222		15.8274	7.5682	9.90715	10.985	11.079	12.7964	14.1255		15.8274	7.5682	9.45156	10.56	11.0242	10.1753	9.7562		15.8274	7.5682	9.0759	10.361	12.361	10.8146	9.87494

## Sheet: CAT
30 mins reduced Glu-SeNPs								1 hour reduced Glu-SeNPs								30 mins reduced Orange-SeNPs								1 hour reduced Orange-SeNPs
Control	CuSO4	5 µg/ml	10 µg/ml	15 µg/ml	20 µg/ml	25 µg/ml		Control	CuSO4	5 µg/ml	10 µg/ml	15 µg/ml	20 µg/ml	25 µg/ml		Control	CuSO4	5 µg/ml	10 µg/ml	15 µg/ml	20 µg/ml	25 µg/ml		Control	CuSO4	5 µg/ml	10 µg/ml	15 µg/ml	20 µg/ml	25 µg/ml
8.87762	2.00011	4.23301	4.95499	5.48123	6.08009	6.9324		8.87762	2.00011	4.19276	4.72763	5.27757	6.57885	7.58816		8.87762	2.00011	4.29975	5.7228	6.1449	5.66494	4.99811		8.87762	2.00011	3.48505	4.7732	5.86948	5.02016	4.36754
9.0988	2.49464	5.06419	5.69764	5.90178	6.37985	7.87986		9.0988	2.49464	4.89465	5.17464	5.58464	5.90845	6.81136		9.0988	2.49464	3.79465	5.18964	5.5947	5.04895	4.591		9.0988	2.49464	3.98469	4.29842	4.96156	4.39489	4.19846
8.19635	2.97646	5.57946	6.09785	6.59746	6.97846	7.17974		8.19635	2.97646	5.37947	5.77941	6.19785	6.47462	7.09746		8.19635	2.97646	4.59642	4.99746	5.19609	4.86416	4.19796		8.19635	2.97646	4.54961	5.09846	6.19846	5.69864	5.09863

## Sheet: GSH
30 mins reduced Glu-SeNPs								1 hour reduced Glu-SeNPs								30 mins reduced Orange-SeNPs								1 hour reduced Orange-SeNPs
Control	CuSO4	5 µg/ml	10 µg/ml	15 µg/ml	20 µg/ml	25 µg/ml		Control	CuSO4	5 µg/ml	10 µg/ml	15 µg/ml	20 µg/ml	25 µg/ml		Control	CuSO4	5 µg/ml	10 µg/ml	15 µg/ml	20 µg/ml	25 µg/ml		Control	CuSO4	5 µg/ml	10 µg/ml	15 µg/ml	20 µg/ml	25 µg/ml
7.83751	4.73603	5.67574	5.88088	6.15662	6.68235	6.97846		7.83751	4.73603	5.39044	5.60515	5.85662	6.0015	6.411		7.83751	4.73603	5.05754	5.3756	6.26789	6.06499	5.46169		7.83751	4.73603	5.1875	5.42206	5.84919	5.39632	5.01368
7.51833	4.12564	5.09567	5.66849	5.93445	6.37966	6.66468		7.51833	4.12564	4.93165	5.29646	5.76632	5.99278	6.19635		7.51833	4.12564	4.76416	4.96874	5.75631	5.26576	4.90486		7.51833	4.12564	4.46956	4.93154	5.21896	4.86516	4.56549
8.33404	5.15653	5.77416	6.37948	6.75168	7.15874	7.42647		8.33404	5.15653	5.49687	6.06431	6.43683	6.66874	6.87768		8.33404	5.15653	5.4125	5.82721	6.51544	6.24044	6.0051		8.33404	5.15653	5.54865	5.96458	6.1	5.26796	5.49796

## Sheet: GST
30 mins reduced Glu-SeNPs								1 hour reduced Glu-SeNPs								30 mins reduced Orange-SeNPs								1 hour reduced Orange-SeNPs
Control	CuSO4	5 µg/ml	10 µg/ml	15 µg/ml	20 µg/ml	25 µg/ml		Control	CuSO4	5 µg/ml	10 µg/ml	15 µg/ml	20 µg/ml	25 µg/ml		Control	CuSO4	5 µg/ml	10 µg/ml	15 µg/ml	20 µg/ml	25 µg/ml		Control	CuSO4	5 µg/ml	10 µg/ml	15 µg/ml	20 µg/ml	25 µg/ml
9.05719	4.63225	6.25611	6.90844	7.55581	8.07222	8.15485		9.05719	4.63225	4.90606	5.73106	6.83745	7.97744	8.54264		9.05719	4.63225	5.72009	6.46284	7.29132	6.01615	4.73069		9.05719	4.63225	4.65102	6.70819	7.67286	7.02065	5.29729
8.27719	3.45225	5.06071	6.62318	7.03468	7.75059	7.82897		8.27719	3.45225	4.20208	6.47204	7.29729	7.08841	8.00464		8.27719	3.45225	5.16112	5.73248	8.05324	5.22378	5.26001		8.27719	3.45225	5.44296	6.32771	7.08591	6.21389	6.01511
8.44719	4.04225	5.72009	6.26284	6.90132	7.11615	8.73069		8.44719	4.04225	5.5921	5.65126	6.63362	7.34228	7.64537		8.44719	4.04225	4.72059	6.12055	7.4273	6.32414	4.27439		8.44719	4.04225	4.95719	6.9884	7.91321	6.89431	5.54184

## Sheet: LPO
30 mins reduced Glu-SeNPs								1 hour reduced Glu-SeNPs								30 mins reduced Orange-SeNPs								1 hour reduced Orange-SeNPs
Control	CuSO4	5 µg/ml	10 µg/ml	15 µg/ml	20 µg/ml	25 µg/ml		Control	CuSO4	5 µg/ml	10 µg/ml	15 µg/ml	20 µg/ml	25 µg/ml		Control	CuSO4	5 µg/ml	10 µg/ml	15 µg/ml	20 µg/ml	25 µg/ml		Control	CuSO4	5 µg/ml	10 µg/ml	15 µg/ml	20 µg/ml	25 µg/ml
19.2015	84.0296	64.0296	57.2344	48.1538	41.15	31.9796		19.2015	84.0296	70.6543	65.0048	59.9424	51.6306	38.8051		19.2015	84.0296	72.9544	66.6069	43.855	54.2662	58.8097		19.2015	84.0296	73.6388	55.006	38.0199	49.3542	64.1026
13.1766	78.0796	58.9796	50.9642	39.975	32.9875	22.675		13.1766	78.0796	75.9865	69.8765	53.7846	49.9865	30.8457		13.1766	78.0796	69.4962	60.9785	56.495	51.9746	63.9656		13.1766	78.0796	78.9746	61.9674	48.6979	57.9741	55.9795
18.895	82.9792	63.9794	52.9796	45.9797	37.9796	27.3299		18.895	82.9792	68.8976	55.8454	50.8456	45.7985	31.8965		18.895	82.9792	75.6496	69.9795	49.975	60.8492	68.9876		18.895	82.9792	71.9747	66.4917	52.688	51.8498	57.9875

## Sheet: NO
30 mins reduced Glu-SeNPs								1 hour reduced Glu-SeNPs								30 mins reduced Orange-SeNPs								1 hour reduced Orange-SeNPs
Control	CuSO4	5 µg/ml	10 µg/ml	15 µg/ml	20 µg/ml	25 µg/ml		Control	CuSO4	5 µg/ml	10 µg/ml	15 µg/ml	20 µg/ml	25 µg/ml		Control	CuSO4	5 µg/ml	10 µg/ml	15 µg/ml	20 µg/ml	25 µg/ml		Control	CuSO4	5 µg/ml	10 µg/ml	15 µg/ml	20 µg/ml	25 µg/ml
6.84211	12.6667	10.3526	8.36842	7.70175	7.08947	7.15088		6.84211	12.6667	11.2982	10.4561	9.84065	8.91228	7.29825		6.84211	12.6667	10.4035	9.93865	9.53326	10.1755	11.1632		6.84211	12.6667	11.8947	10.8421	9.64912	10.214	10.9246
6.03311	13.9462	9.36328	9.02493	8.43495	7.92315	6.74934		6.03311	13.9462	9.56328	8.92493	8.34495	7.92315	7.54934		6.03311	13.9462	11.3158	10.4656	8.99649	9.22186	9.96547		6.03311	13.9462	12.3468	11.5547	10.3468	11.1333	11.815
6.62189	12.3195	9.85674	9.35232	8.51349	7.13556	6.23189		6.62189	12.3195	11.5567	9.35232	8.91349	7.13556	6.23189		6.62189	12.3195	9.54949	8.92648	8.08793	10.4535	10.758		6.62189	12.3195	11.1247	9.93267	9.06579	10.4794	11.3219

[truncated: 5 more sheets: AChE, RT-PCR, DCFDA, DPPP, Movement]
