# Supplementary material for: Glucose reduced nano-Se mitigates Cu-induced ROS by upregulating antioxidant genes in zebrafish larvae
Source: Royal Society of Chemistry journal article supplement (doi:10.1039/d4na00644e), 2025-01-01
Supplement: d4na00644e2.pdf [file d4na00644e2.pdf]

**Title: Glucose Reduced Nano-Se Mitigate Cu-Induced ROS by Upregulating Antioxidant Gene in Zebrafish Larvae**

**Author Name:** Suganiya Umapathy and Ieshita Pan\*

**Address:** Institute of Biotechnology, Department of Medical Biotechnology, Saveetha School of Engineering, Saveetha Institute of Medical and Technical Sciences, Thandalam, Chennai, 602 105, Tamil Nadu, India

**\*Correspondence:** [bony.iesk@gmail.com](mailto:bony.iesk@gmail.com); [ieshitapan.sse@saveetha.com](mailto:ieshitapan.sse@saveetha.com)

**Running Head: Mussel-extracted Nano-Se as Therapeutics**

**Keywords:** Oxidative Stress, Nano-Se, Zebrafish Model, Antioxidant, Cognitive, Neurodegenerative Diseases

**Supplementary Table 1: Key Chemical Attributes of Selenium Nanoparticles**

| Wavenumber (cm <sup>-1</sup> ) | Functional Group        | Chemical Attribute          |
|--------------------------------|-------------------------|-----------------------------|
| 3279–3273                      | C-H stretching          | Alkene                      |
| 2924–2850                      | C-H stretching          | Alkane                      |
| 1627                           | C=C stretching          | Di-substituted alkene       |
| 1532–1515                      | N-O stretching          | Nitro compound              |
| 1405–1392                      | S=O stretching          | Sulfonyl chloride           |
| 1236–1228                      | C-O stretching          | Alkyl aryl ether            |
| 1037–1031                      | S=O stretching          | Sulfoxide                   |
| 518–404                        | Metal-ligand stretching | Selenium-metal interactions |

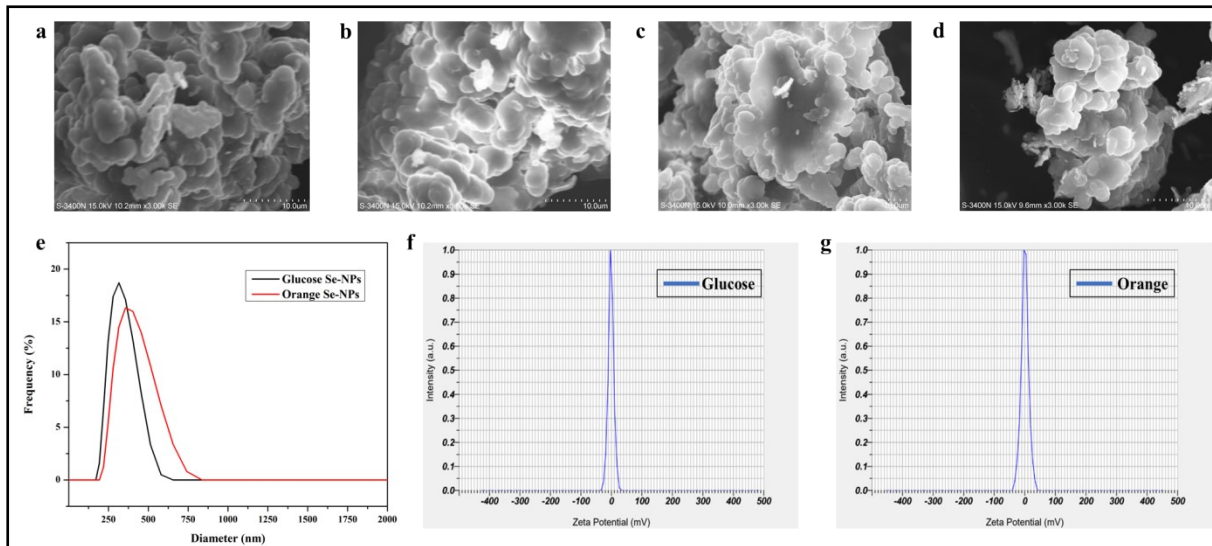

**Supplementary Figure 1:** SEM (a-b) Non-stabilized Se-NPs reduced for 30 minutes and 1hour; (c-d) Non-stabilized Se-NPs reduced for 30 minutes and 1 hour with orange. DLS (e) stabilized Se-NPs reduced for 30 minutes with D-glucose and orange. Zeta potential (f) stabilized Se-NPs reduced for 30 minutes with D-glucose, (g) stabilized Se-NPs reduced for 30 minutes with orange.

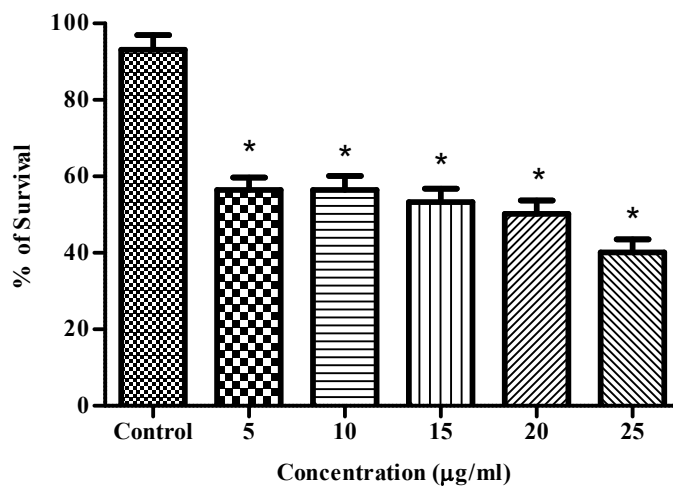

**Supplementary Figure2:** Survival Rate of Zebrafish Embryo Treated with Selenium

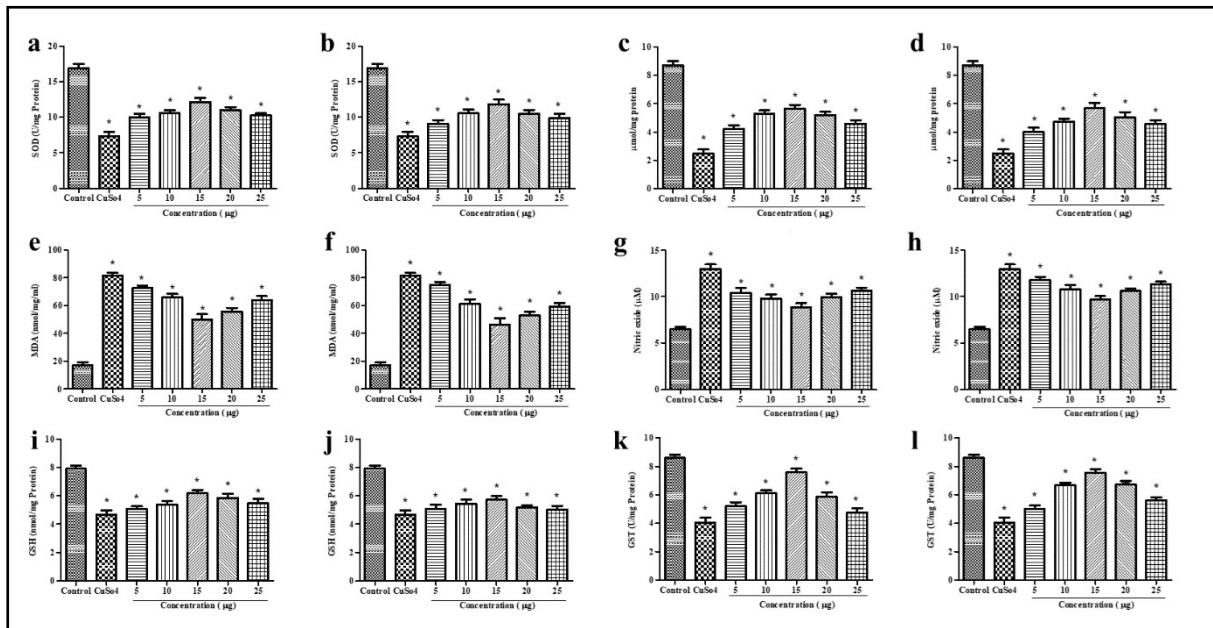

**Supplementary Figure 3:** SOD assay (a-b) reduced with orange peel extract for 30 minutes and 1 hour. CAT assay (c-d) reduced with orange peel extract for 30 minutes and 1 hour. LPO assay (e-f) reduced with orange peel extract for 30 minutes and 1 hour. NO assay (g-h) reduced with orange peel extract for 30 minutes and 1 hour. GSH assay (i-j) reduced with orange peel extract for 30 minutes and 1 hour. GST assay (k-l) reduced with orange peel extract for 30 minutes and 1 hour. The data were considered significant ( $p < 0.05$ ) and marked by the symbol “\*”.
